# Supplementary material for: A novel dual-switch fluorescent probe for Cr(iii) ion based on PET–FRET processes
Source: Royal Society of Chemistry journal article supplement (doi:10.1039/c4an00303a), 2014-01-01
Supplement: c4an00303a1.pdf [file c4an00303a1.pdf]

## Supporting Information

### A Novel Dual-switch Fluorescent Probe for Cr(III) Ion Based on PET-FRET Processes

*Fangzhi Hu,<sup>a</sup> Baozhan Zheng,<sup>a</sup> Dongmei Wang,<sup>a</sup> Maoping Liu,<sup>a</sup> Juan Du\*,<sup>a</sup> and Dan Xiao\*,<sup>a,b</sup>*

*<sup>a</sup> College of Chemistry, Sichuan University, Chengdu 610064, PR China*

*<sup>b</sup> College of Chemical Engineering, Sichuan University, Chengdu 610065, PR China*

E-mail: xiaodan@scu.edu.cn;

E-mail: lxdj@vip.sina.com;

Fax: +86 28-85416029; Tel: +86-28-85415029

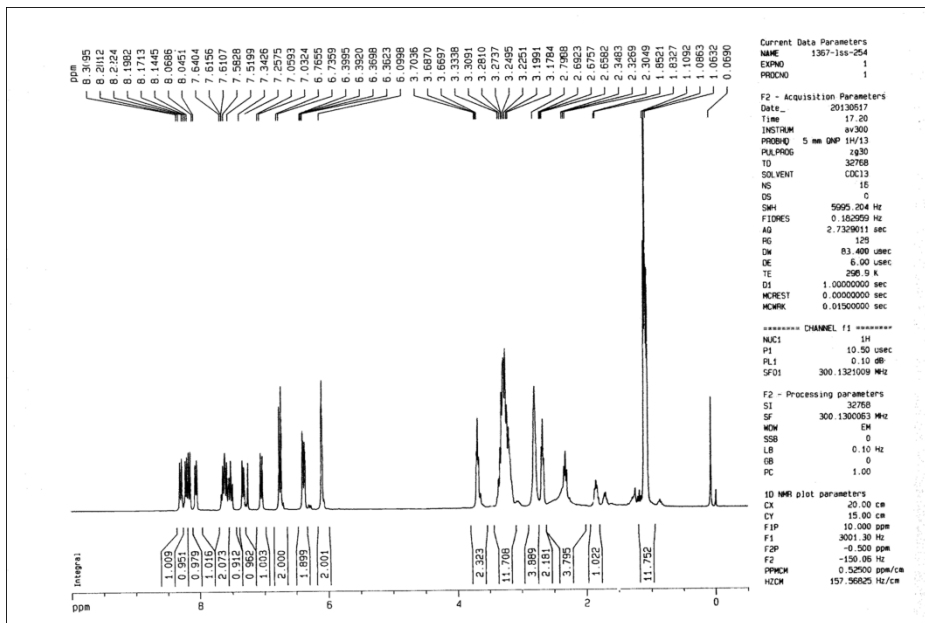

Figure S-1. <sup>1</sup>H NMR spectrum of NNRhB.

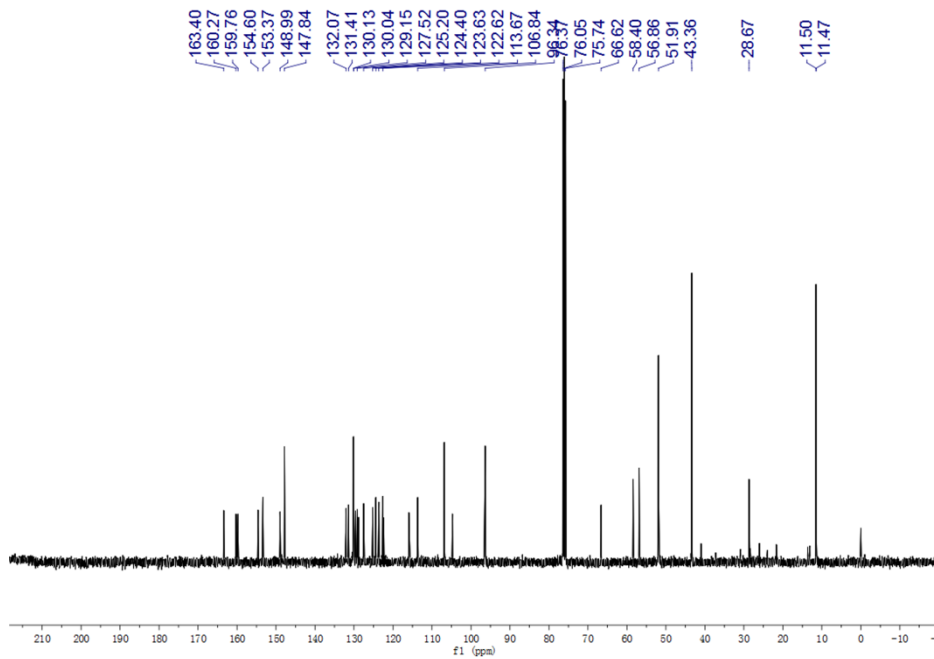

Figure S-2. <sup>13</sup>C NMR spectrum of NNRhB.

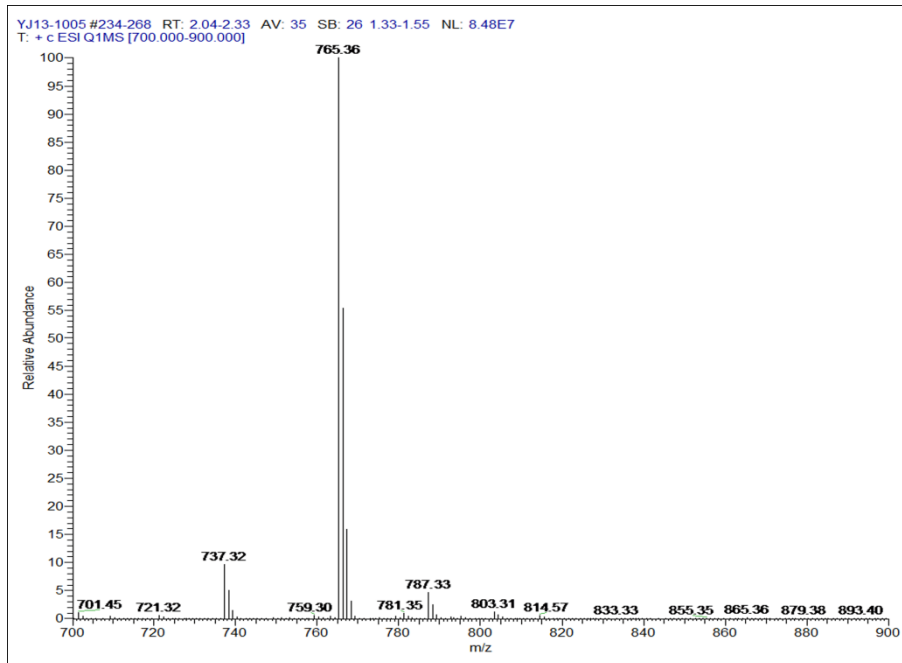

Figure S-3. ESI-MS spectrum of NNRhB.

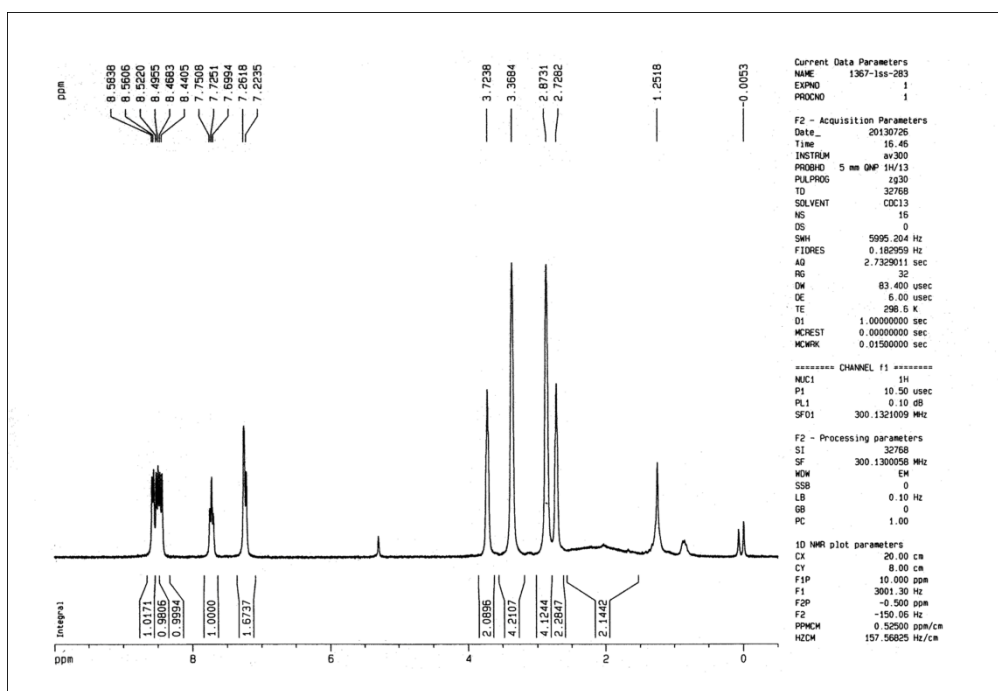

Figure S-4. <sup>1</sup>H NMR spectrum of compound 1.

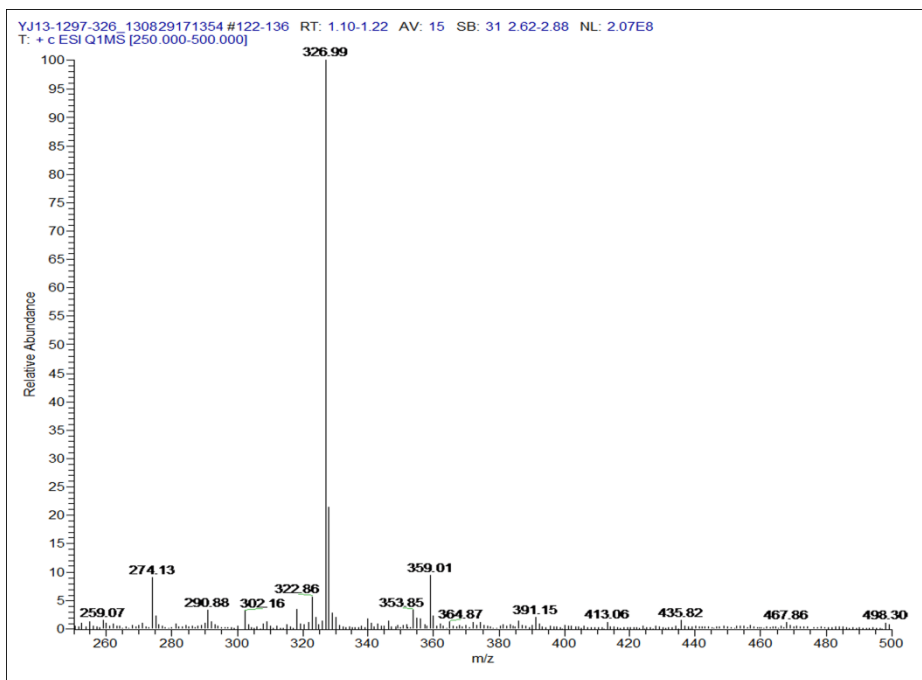

Figure S-5. ESI-MS spectrum of compound 1.

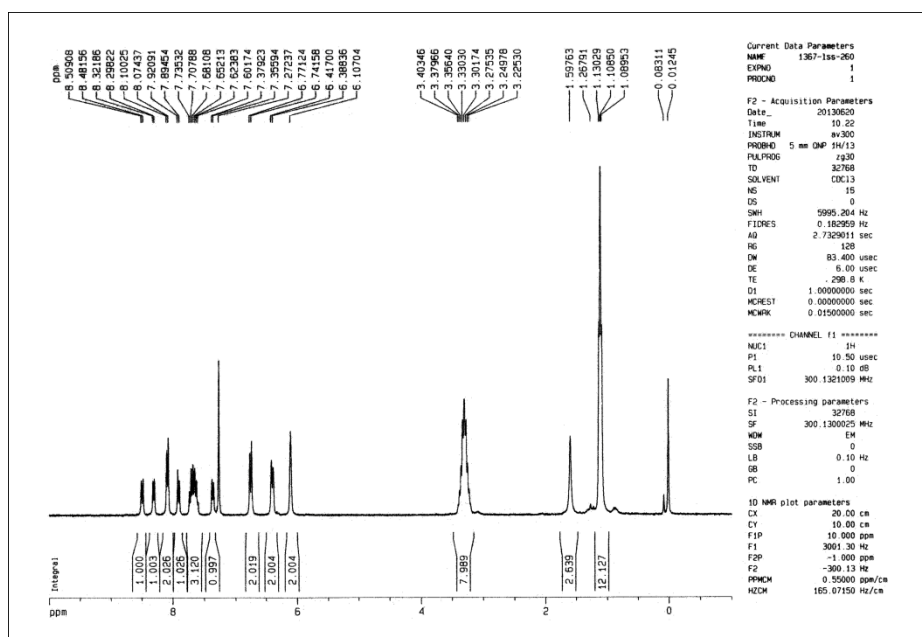

Figure S-6. <sup>1</sup>H NMR spectrum of compound 2.

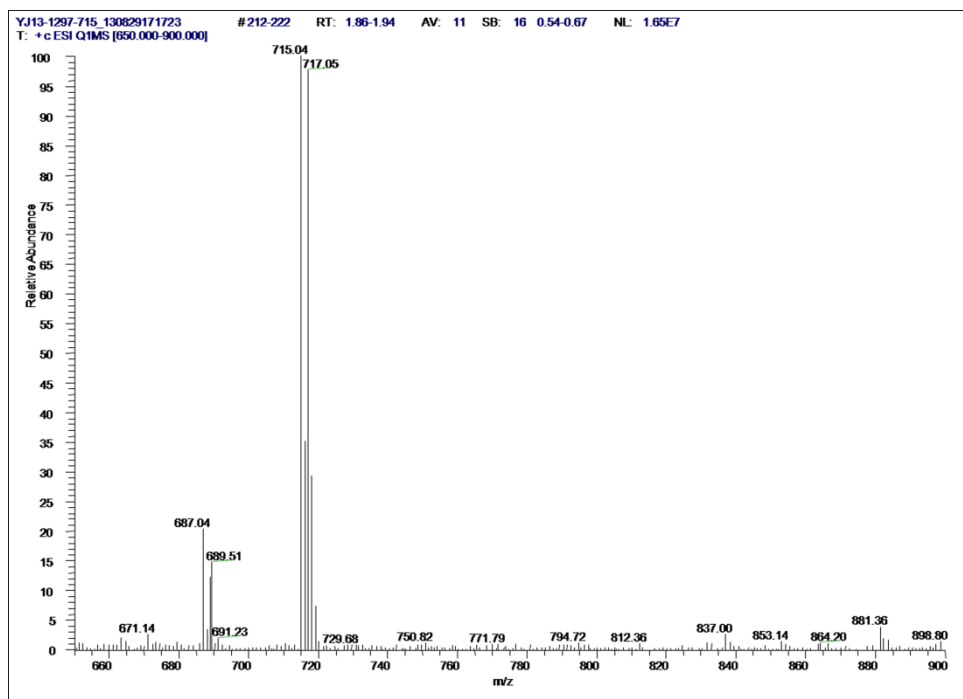

Figure S-7. ESI-MS spectrum of compound 2.

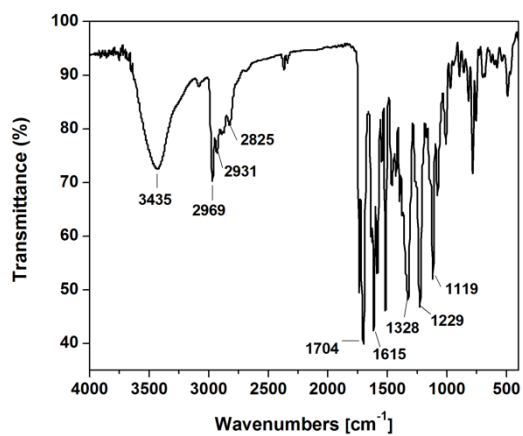

Figure S-8. FT-IR spectra of NNRhB.

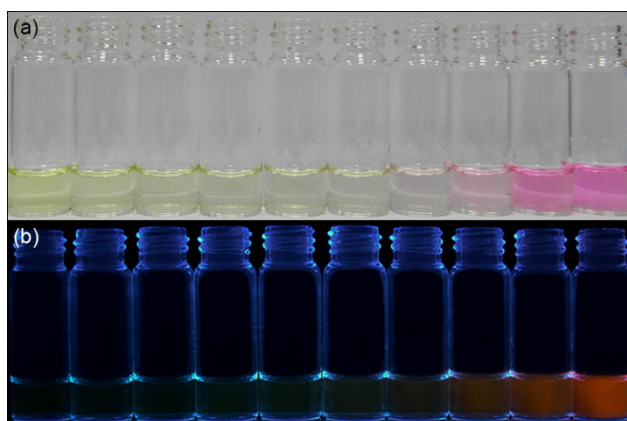

**Figure S-9.** Photographs of color changes (a) and fluorescence responses (b) of NNRhB coordinated with different concentration of  $\text{Cr}^{3+}$  ions (from left to right: 0, 5, 10, 20, 30, 40, 50, 60, 70 and 80  $\mu\text{M}$ ).

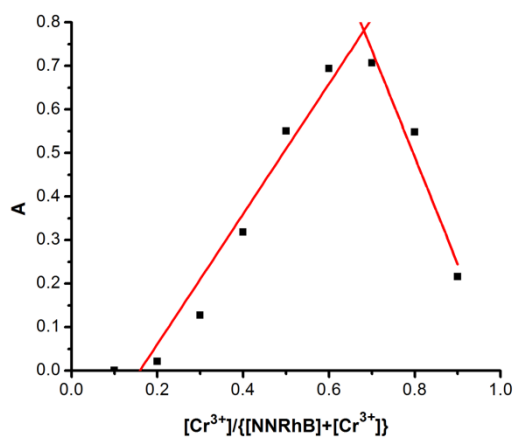

**Figure S-10.** Job's plot showing the 1:2 binding of NNRhB with  $\text{Cr}^{3+}$  ion.

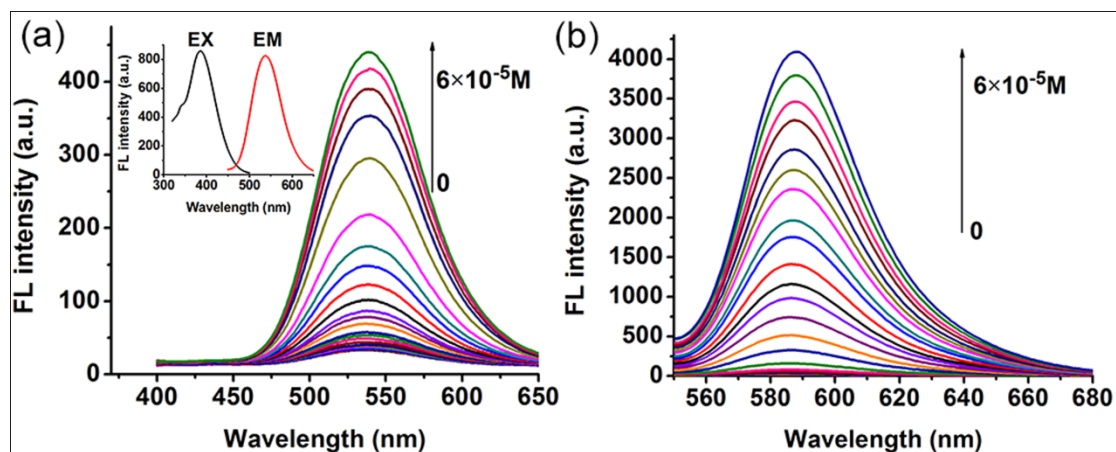

**Figure S-11.** (a) Fluorescence spectra of compound **1** (13 μM) upon addition of increasing Cr<sup>3+</sup> concentrations in CH<sub>3</sub>CN/HEPES buffer solution (0-60 μM). (2:1, v/v, 0.5 mM, pH = 7.4) ( $\lambda_{\text{ex}} = 386$  nm). (Inset: Excitation spectra and emission spectra of compound **1**.) (b) Fluorescence spectra of compound **2** (13 μM) upon addition of increasing Cr<sup>3+</sup> concentrations in CH<sub>3</sub>CN/HEPES buffer solution (0-60 μM). (2:1, v/v, 0.5 mM, pH = 7.4;  $\lambda_{\text{ex}} = 530$  nm).

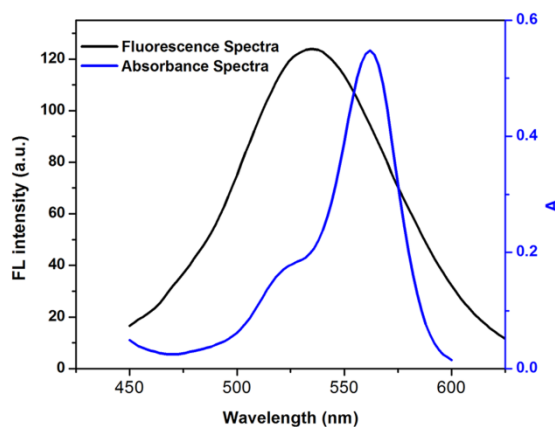

**Figure S-12.** The spectral overlap between the absorption of Cr<sup>3+</sup>-compound **2** and the fluorescence emission of Cr<sup>3+</sup>-compound **1**.

| Reagent                 | Selectivity                         | Detection range ( $\mu\text{M}$ ) | Detection limit (nM) | Ref.     |
|-------------------------|-------------------------------------|-----------------------------------|----------------------|----------|
| Rhodamine B derivative  | $\text{Cr}^{3+}$                    | -                                 | 1000                 | 1        |
| Rhodamine B derivative  | $\text{Hg}^{2+}$ ; $\text{Cr}^{3+}$ | -                                 | 0.14                 | 2        |
| Quercetin               | Cr                                  | 0.1-2                             | 9.1                  | 3        |
| Rhodamine derivative    | $\text{Cr}^{3+}$                    | 0.1-8                             | 3.75                 | 4        |
| Rhodamine 6G derivative | $\text{Fe}^{3+}$ ; $\text{Cr}^{3+}$ | -                                 | -                    | 5        |
| Acridone derivative     | $\text{Cr}^{3+}$                    | 1-18                              | 200                  | 6        |
| Rhodamine B derivative  | $\text{Cr}^{3+}$                    | 0.03-80                           | 0.14                 | Our work |

**Table S-1.** Comparison of our probe with other fluorescent organic molecules for the detection of  $\text{Cr}^{3+}$ .

| Sample            | Added ( $\mu\text{M}$ ) | found ( $\mu\text{M}$ ) | Recovery(%) | RSD(%) |
|-------------------|-------------------------|-------------------------|-------------|--------|
|                   | 0                       | 0                       |             |        |
|                   | 10                      | 10.36                   | 103.6       |        |
| <b>Pond water</b> | 10                      | 10.31                   | 103.1       | 0.436  |
|                   | 10                      | 10.43                   | 104.3       |        |
|                   | 0                       | 0                       |             |        |
|                   | 10                      | 9.63                    | 96.3        |        |
| <b>Tap water</b>  | 10                      | 9.59                    | 95.9        | 0.267  |
|                   | 10                      | 9.65                    | 96.5        |        |

**Table S-2.** Recovery study of spiked  $\text{Cr}^{3+}$  in pond water and tap water with proposed sensing system.



| Sample             | Added ( $\mu\text{M}$ ) | Found ( $\mu\text{M}$ ) | Recovery(%) | RSD(%) |
|--------------------|-------------------------|-------------------------|-------------|--------|
|                    | 0                       | 0                       |             |        |
|                    | 10                      | 10.08                   | 100.8       |        |
| <b>Cell lysate</b> | 10                      | 10.05                   | 100.5       | 0.168  |
|                    | 10                      | 10.05                   | 100.5       |        |
|                    | 0                       | 0                       |             |        |
|                    | 10                      | 10.05                   | 100.5       |        |
| <b>blood serum</b> | 10                      | 10.13                   | 101.3       | 0.424  |
|                    | 10                      | 10.06                   | 100.6       |        |

**Table S-3.** Recovery study of spiked  $\text{Cr}^{3+}$  in cell lysate and blood serum with proposed sensing system.

#### REFERENCES

1. Y. Wan, Q. Guo, X. Wang and A. Xia, *Analy. Chim. Acta*, 2010, 665, 215-220.
2. P. Mahato, S. Saha, E. Suresh, R. Di Liddo, P. P. Parnigotto, M. T. Conconi, M. K. Kesharwani, B. Ganguly and A. Das, *Inorg. Chem.*, 2012, 51, 1769-1777.
3. M. S. Hosseini and F. Belador, *J. Hazard. Mater.*, 2009, 165, 1062-1067.
4. P. Xie, F. Guo, Y. Xiao, Q. Jin, D. Yao and Z. Huang, *J. Lumin.*, 2013.
5. J. Mao, L. Wang, W. Dou, X. Tang, Y. Yan and W. Liu, *Org. Lett.*, 2007, 9, 4567-4570.
6. D. Karak, A. Banerjee, A. Sahana, S. Guha, S. Lohar, S. S. Adhikari and D. Das, *J. Hazard. Mater.*, 2011, 188, 274-280.
